# Supplementary material for: Dopamine neuron morphology and output are differentially controlled by mTORC1 and mTORC2
Source: eLife journal article supplement (doi:10.7554/elife.75398), 2022-07-11

DA-Raptor KO  
Western blots  
Gel 1

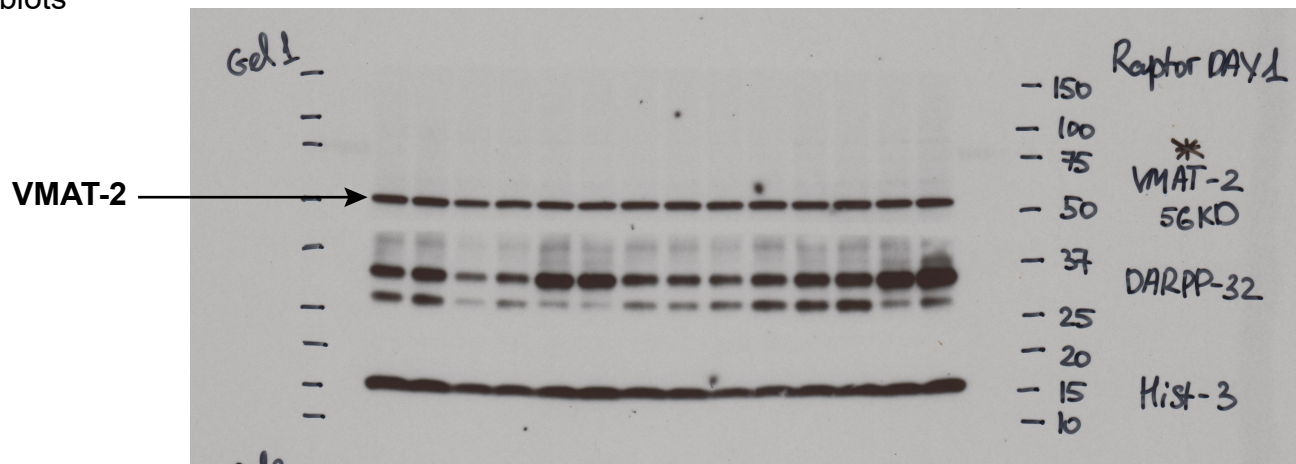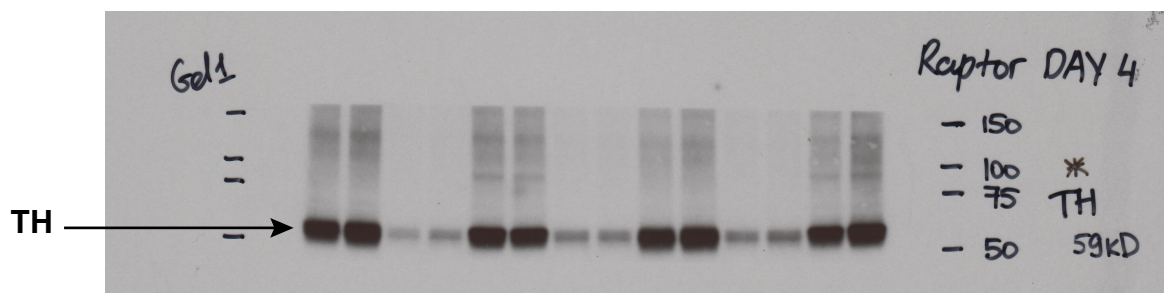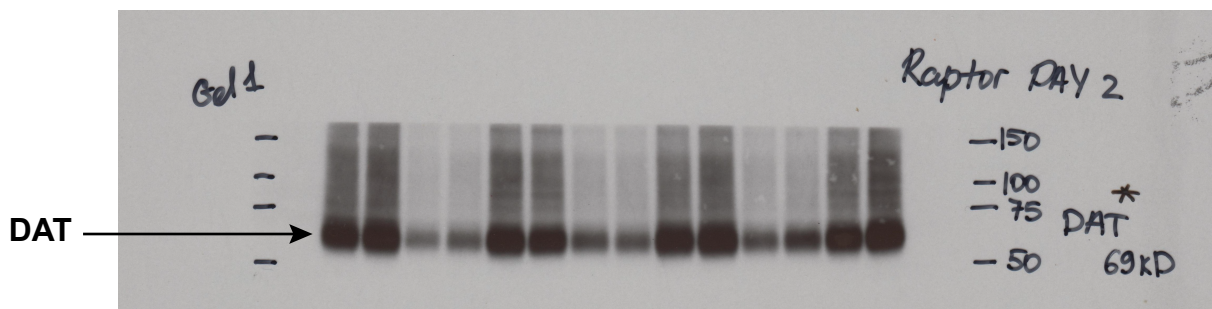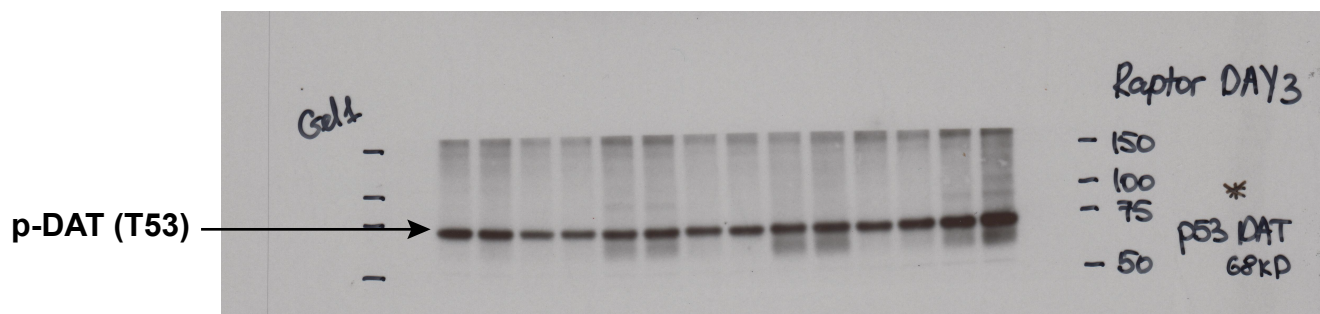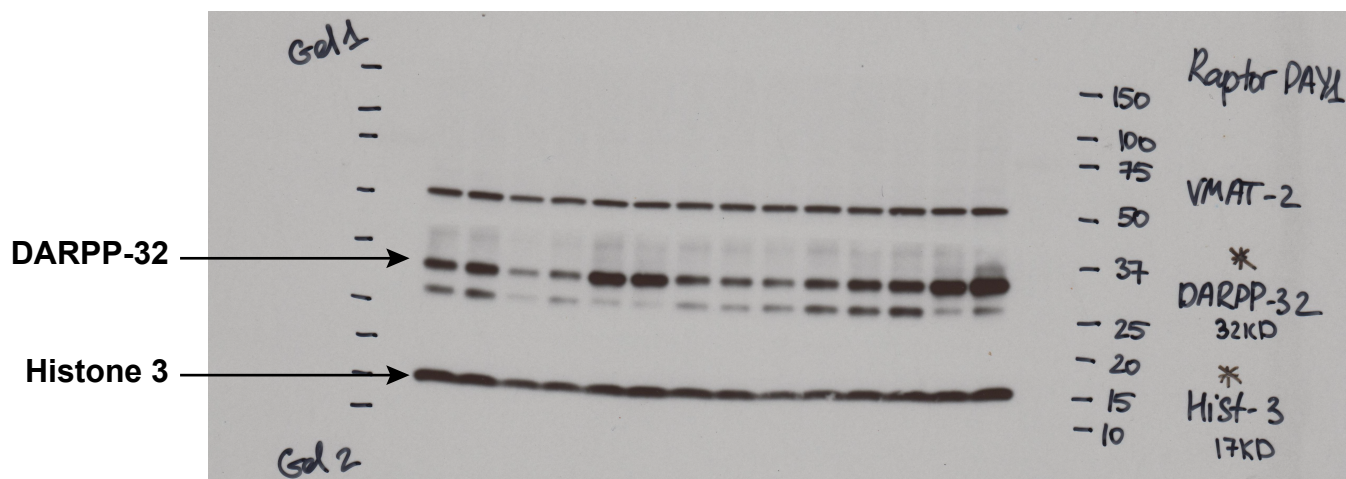

Supplement: fig8-data1 [file elife-75398-fig8-data1-v1.pdf]
